# Supplementary material for: Identification and Functional Analysis of Individual-Specific Subpathways in Lung Adenocarcinoma
Source: MDPI journal article supplement (doi:10.3390/genes13071122), 2022-06-23
Supplement: s1 [file s1]

Table S1 Driver mutation genes in human cancer

| Gene Symbol | Gene Symbol | Gene Symbol | Gene Symbol |
|-------------|-------------|-------------|-------------|
| ABL1        | CYLD        | KIT         | PTEN        |
| ACVR1B      | DAXX        | KLF4        | PTPN11      |
| AKT1        | DNMT1       | KRAS        | RB1         |
| ALK         | DNMT3A      | MAP2K1      | RET         |
| APC         | EGFR        | MAP3K1      | RNF43       |
| AR          | EP300       | MED12       | RUNX1       |
| ARID1A      | ERBB2       | MEN1        | SETD2       |
| ARID1B      | EZH2        | MET         | SETBP1      |
| ARID2       | FAM123B     | MLH1        | SF3B1       |
| ASXL1       | FBXW7       | MLL2        | SMAD2       |
| ATM         | FGFR2       | MLL3        | SMAD4       |
| ATRX        | FGFR3       | MPL         | SMARCA4     |
| AXIN1       | FLT3        | MSH2        | SMARCB1     |
| B2M         | FOXL2       | MSH6        | SMO         |
| BAP1        | FUBP1       | MYD88       | SOCS1       |
| BCL2        | GATA1       | NCOR1       | SOX9        |
| BCOR        | GATA2       | NF1         | SPOP        |
| BRAF        | GATA3       | NF2         | SRSF2       |
| BRCA1       | GNA11       | NFE2L2      | STAG2       |
| BRCA2       | GNAQ        | NOTCH1      | STK11       |
| CARD11      | GNAS        | NOTCH2      | TET2        |
| CASP8       | H3F3A       | NPM1        | TNFAIP3     |
| CBL         | HIST1H3B    | NRAS        | TRAF7       |
| CDC73       | HNF1A       | PAX5        | TP53        |
| CDH1        | HRAS        | PBRM1       | TSC1        |
| CDKN2A      | IDH1        | PDGFRA      | TSHR        |
| CEBPA       | IDH2        | PHF6        | U2AF1       |
| CIC         | JAK1        | PIK3CA      | VHL         |
| CREBBP      | JAK2        | PIK3R1      | WT1         |
| CRLF2       | JAK3        | PPP2R1A     |             |
| CSF1R       | KDM5C       | PRDM1       |             |
| CTNNB1      | KDM6A       | PTCH1       |             |

Table S2 The potential disease genes in all LUAD samples

| Gene   | Gene    | Gene    |
|--------|---------|---------|
| PRKX   | ITGA2   | PLCB2   |
| PLCB3  | PIK3CG  | ITGA3   |
| PIK3R2 | ENTPD3  | ITGB1   |
| PIK3CA | PRKACA  | NME2    |
| PLCB1  | GNGT1   | ADCY6   |
| PIK3CB | KRAS    | ITGA10  |
| PLCB4  | UGT1A5  | NME4    |
| AKT2   | ADCY9   | ADCY3   |
| ITGB4  | UGT1A7  | AKT1    |
| UGT1A3 | ADCY5   | NME1    |
| UGT1A9 | ENTPD8  | ADCY4   |
| ITGAV  | UGT1A8  | UGT1A6  |
| GNAS   | UGT1A10 | UGT2B28 |
| ITGA6  | PIK3R1  | UGT1A5  |
| PIK3R5 | PLA2G2F | ADCY9   |
| ITGA8  | UGT1A1  | UGT1A7  |
| ITGA9  | ITGB8   | ADCY5   |
| GNG4   | PIK3CD  | ENTPD8  |
| ADCY2  | ITGA1   | UGT1A8  |
| AKT3   | ITGA11  |         |
